# Supplementary material
Source: ML conference proceedings conference paper supplement (https://proceedings.mlr.press/v48/guha16.html)
Supplement: Supplementary file [file guha16-supp.pdf]

## A. Theorem 1: Low Stretch Spanning Trees

Observe that in the construction of  $RRCF(S)$  where the sum of the lengths of the sides of  $B(S)$  is denoted by  $P(S)$ , the probability that we separated two points  $\mathbf{x}(1), \mathbf{x}(2)$  by the first cut is proportional to the  $L_1$  distance measure:

$$\frac{1}{P(S)} \sum_i |\mathbf{x}(1)_i - \mathbf{x}(2)_i|$$

Also observe that  $P(S)$  decreases by at least a factor of  $(1 - \frac{1}{2d})$ . To observe this, note that if we start with a rectangle where side  $i$  has length  $\ell_i$  (and  $\sum_i \ell_i = P(S)$ ) then the new expected perimeter of either side decreases by (the first term corresponds to choosing the dimension and the second term is the expected decrease in that dimension),

$$\sum_i \frac{\ell_i}{P(S)} \frac{\ell_i}{2} \geq \frac{\sum_i \ell_i^2}{2 \sum_i \ell_i} \geq \frac{\sum_i \ell_i}{2d}$$

**Lemma 7** *Given a tree  $T$  in  $RRCF(S)$  suppose we measure the distance between two points as follows: we find the first level where the points are separated and let the set be  $S$ . We assign the distance  $P(S)$ , i.e., the sum of the edge lengths of the minimum bounding box  $B(S)$ . Then the expected length of pair of points  $\mathbf{x}(1), \mathbf{x}(2)$  is  $L_1(\mathbf{x}(1), \mathbf{x}(2))$  times the expected number of steps to separate  $\mathbf{x}(1), \mathbf{x}(2)$ . Observe that we never assign a distance less than  $L_1(\mathbf{x}(1), \mathbf{x}(2))$ .*

**Proof:** Follows from the fact that the distance assigned at a level corresponding to  $S'$  is  $P(S')$  and the probability of that distance assignment is  $L_1(\mathbf{x}(1), \mathbf{x}(2))/P(S')$ . The expected distance therefore is  $L_1(\mathbf{x}(1), \mathbf{x}(2))$  times the expected number of steps that separate the two points!  $\square$

**Remark:** Note that the expected number of steps can be bounded by  $O(d \log P(S)/L_1)$  since  $P(S)$  decreases by a  $(1 - \frac{1}{2d})$  factor in expectation. Other bounds can also be used – for example logarithm of the ratio of the total volume to the volume of the smallest box that contains  $\mathbf{x}(1), \mathbf{x}(2)$  since in each step we divide the volume by  $\frac{1}{2}$  in expectation.

## B. Omitted Proofs

### B.1. Proof of Lemma 1

We restate the lemma.

**Lemma 8** *The expected displacement caused by a point  $x$  is the expected number of points in the sibling node of the leaf node containing  $x$ , when the partitioning is done according to the algorithm in Definition 1.*

**Proof:** In the absence of  $x$ , (in Figure 2b) the representation would be  $q_0, \dots, q_r, 0, \dots$ , in other words we would

need 1 fewer bit to represent the point  $p$ . Therefore:

$$f(y, Z, T) - f(y, Z - \{x\}, T) = \begin{cases} 1 & y \in \text{sibling } c \text{ of } x \\ 0 & \text{otherwise} \end{cases}$$

The lemma follows.  $\square$

### B.2. Proof of Lemma 2

We restate the lemma.

**Lemma 9**  $\text{CODISP}(x, Z, |S|)$  can be estimated efficiently.

**Proof:** Observe that following the logic of Lemma 1, the difference

$$f(y, S, T) - f(y, S - C, T)$$

is nonzero for  $y \in Z - C$  if and only iff we delete all the elements in a sibling subtree containing  $y$ . For example in Figure 2a, if  $|b|$  is large, then the collusive displacement will be large only if we delete all the nodes in  $c$  along with  $x$ . Moreover to achieve any nonzero displacement we have to simultaneously delete all copies of  $x$ ; and the result will scale down based on the number of duplicates. Observe that a consequence, given a  $T$ , we can compute

$$\max_{x \in C \subseteq S} \frac{1}{|C|} \sum_{y \in S - C} \left( f(y, S, T) - f(y, S - C, T) \right)$$

optimally by considering only the subtrees in the leaf to root path defined by  $x$ .  $\square$

### B.3. Proof of Lemma 3

We restate the lemma.

**Lemma 10** *Given point  $p$  and set of points  $S$  with an axis parallel minimal bounding box  $B(S)$  such that  $p \notin B$ :*

- (i) *For any dimension  $i$ , the probability of choosing an axis parallel cut in a dimension  $i$  that splits  $S$  using the weighted isolation forest algorithm is exactly the same as the conditional probability of choosing an axis parallel cut that splits  $S \cup \{p\}$  in dimension  $i$ , conditioned on not isolating  $p$  from all points of  $S$ .*
- (ii) *Given a random tree of  $RRCF(S \cup \{p\})$ , conditioned on the fact the first cut isolates  $p$  from all points of  $S$ , the remainder of the tree is a random tree in  $RRCF(S)$ .*

**Proof:** Consider the first part. Let the length of the minimum bounding box of  $S$  in dimension  $i$  be  $\ell_i$ . Let the length of the minimum bounding box of  $S \cup \{p\}$  in dimension  $i$  be  $\ell'_i$ . Thus the probability (density) of choosing a cut  $C$  in dimension  $i$  that splits  $S$  is

$$\frac{1}{\ell_i} \frac{\ell_i}{\sum_i \ell_i}$$

where the first term is the probability density conditioned on the dimension and the second term is the probability of choosing dimension  $i$ . The probability density of achieving the same cut in constructing a weighted isolation forest of  $S \cup \{p\}$  conditioned on not isolating  $p$  and  $S$  is

$$\frac{1}{\ell_i} \mathbb{P}_r [\text{Choosing dimension } i | \text{not isolating } p \text{ and } S]$$

Probability of choosing dimension  $i$  **and** not isolating  $p$  and  $S$  is  $\ell_i / \sum_i \ell'_i$ . Therefore

$$\begin{aligned} & \mathbb{P}_r [\text{Choosing dimension } i | \text{not isolating } p \text{ and } S] \\ &= \frac{\mathbb{P}_r [\text{Choosing dimension } i \text{ and not isolating } p \text{ and } S]}{\mathbb{P}_r [\text{not isolating } p \text{ and } S]} \\ &= \frac{\ell_i / \sum_i \ell'_i}{\sum_i \ell_i / \sum_i \ell'_i} = \frac{\ell_i}{\sum_i \ell_i} \end{aligned}$$

The last part follows from the observation that the probability of not isolating  $p$  and  $S$  is  $\sum_i \ell_i / \sum_i \ell'_i$ . This proves part (i). Note that part (ii) follows from construction.  $\square$

#### B.4. Proof of Lemma 4

We restate the lemma.

**Lemma 11** *If  $T$  were drawn from the distribution  $RRCF(S)$  then Algorithm 1 produces a tree  $T'$  which is drawn at random from the probability distribution  $RRCF(S - \{p\})$ .*

**Proof:** Given  $T$  was drawn from  $RRCF(S)$  consider the random forest algorithm that would have produced this tree. Consider also the random forest algorithm as it produces  $T'$ . We will stochastically couple the decisions of the split operation – mirror the same split in  $T'$  as in  $T$  (Lindvall, 1992). Even though the splits across the two trees are correlated, if we consider only  $T$  or  $T'$ , it would appear that the respective tree was produced with the right distribution. Of course the mirroring will not always be obvious, but we address that below. Initially we have a set  $S' = S$ . Consider the cases (a)–(b) below:

(a) Suppose that we choose the dimension  $i$  in splitting  $T$  and the point  $p$  does not lie on the bounding box of  $S'$  in dimension  $i$ . In this case the presence or absence of the point  $p$  does not affect the distribution of cuts are the same irrespective of the point set  $S'$  or  $S' - \{p\}$ . The construction of  $T'$  therefore can choose the same dimension  $i$  and the same cut as in  $T$ , and that could correspond to be a valid step with the correct probability. Note that after the cut,  $p$  can belong to only one side, say  $S''$ . We will set  $S' = S''$  and recurse. Note that we can use the same subtree (as in  $T$ ) for the subset  $S' - S''$  since there were no change to the point

set. The construction of  $T'$  can completely mirror  $T$  for these subsets, and the construction will preserve the correct probabilities.

(b) Otherwise, we choose dimension  $i$  in splitting  $T$  and point  $p$  lies on the bounding box of  $S'$  in dimension  $i$ . We now have two cases.

(i) Point  $p$  is separated from rest of  $S'$ . In this case  $T$  produces a sibling tree  $T(u)$  starting at node  $u$  which is the sibling node of node  $v$  containing the isolated point  $p$ . But then in  $T'$  we do not have  $p$ , and  $T(u)$  is a random tree from  $RRCF(S' - \{p\})$  and the construction is correct using part (ii) of Lemma 3.

(ii) Point  $p$  is not separated from  $S'$ . By Lemma 3, conditioned on the fact that  $p$  is not separated from  $S'$  we are choosing a random cut which separates  $S' - \{p\}$  along a chosen dimension  $i$ . This is therefore an appropriate choice for  $T'$  using part (i) of Lemma 3 and we choose the same cut in  $T'$ . Again we have two subsets, and in  $T$ ,  $p$  belongs to only one side. We recurse on that side – for the other side the construction of  $T, T'$  can be identical since they have the same set of points.

The above cases are mutually exclusive and exhaustive. This proves the Lemma.  $\square$

#### B.5. Proof of Lemma 6

We restate the lemma.

**Lemma 12** *If  $T$  were drawn from the distribution  $RRCF(S)$  then Algorithm 1 produces a tree  $T'$  which is drawn at random from the probability distribution  $RRCF(S \cup \{p\})$ .*

**Proof:** We proceed in a manner similar to the proof of Lemma 4 — *however instead of using tree  $T$  to define the splits for  $T'$ , we will first make a decision about  $T'$  and then mirror  $T$* . Suppose that we have currently the set of nodes  $S'$ . Note that the case of  $S' = \emptyset$  is trivial. Therefore assume  $S' \neq \emptyset$  and we are given a tree  $T(S')$  from  $RRCF(S')$ .

(a) If we decide to separate  $p$  and  $S'$  then Step 6 in Algorithm 2 generates such a cut. Now after the cut, we observe that  $T(S')$  is already a random tree in  $RRCF(S')$  and we can simply use  $T(S')$  to define  $T'$ .

(b) If we decide to **not** separate  $p$  and  $S'$  then using part (i) of Lemma 3, we can choose any cut that splits the bounding box  $B(S')$ . *Note that the first cut in  $T(S')$  is exactly such a cut chosen with the correct distribution.* Therefore we can use the same cut in  $T'$  in this case. Note that we now have two sides and  $p$  only affects one side – we can use the same subtree as in  $T(S')$  for the

side that does not contain  $p$ . We the side  $S''$  that contains  $p$ . Note that we recursively maintain the property that we have a random tree  $T(S'')$  from  $RRCF(S'')$ .

The above steps are mutually exclusive and exhaustive. This proves the Lemma.  $\square$

### C. Depth and Co-Displacement

As remarked in Section 4.1 the introduction, it is unclear why the (shallowness of) depth in a random cut forest is the best possible predictor of anomalies. We show another example to illustrate that the depth provides us a very noisy signal. Consider the data in Figure 6 which shows an empty donut – the exterior has 2500 points (generated from a Gaussian with mean as the origin and standard deviation  $\sqrt{2}$  and we remove all points within distance 3 from origin till we get 2500 points). The interior circle has 2500 points from a Gaussian around the origin with standard deviation  $\sqrt{0.2}$  and we remove all points which are at a distance larger than 1. We then add the single outlier point  $(1.5, 0)$ .

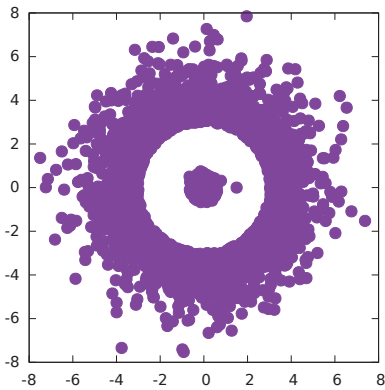

Figure 6. Another simple example dataset

Figure 7 shows the two other points which have larger  $CoDISP()$  than the  $(1.5, 0)$  point. The legend shows the amount of the collusive displacement.

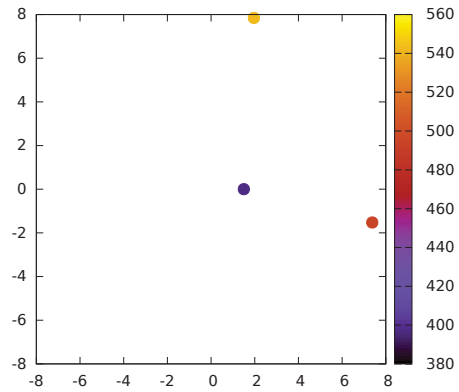

Figure 7.  $CoDISP()$  above the point  $(1.5, 0)$

Figure 8 shows the 87 points (in a particular run) with expected depth below that of  $(1.5, 0)$  when we constructed the trees with the recursive bias. The points are distributed as we would expect in the periphery – any distribution there will be points which are far from the central point, but they are not necessarily outliers.

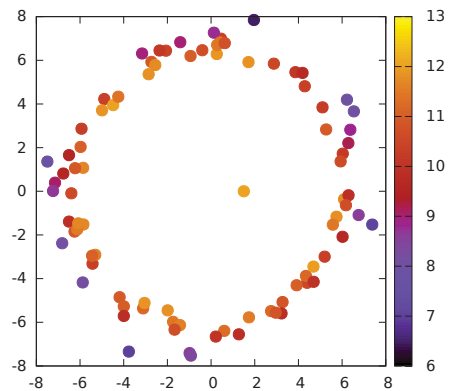

Figure 8.  $g()$  above the point  $(1.5, 0)$

The notion of “surprise” which is captured by (large)  $CoDISP()$  is not the same as the (shallow) expected depth. In fact the sum of these two quantities (almost, given the difference between  $DISP()$  and  $CoDISP()$  – but the Gaussian generation ensures no duplicates) correspond to the total increase in model complexity as discussed in Definition 2. Depth alone does not appear to be a sufficient statistic. Of course this leaves open the possibility of a non-parametric model-based definition that incorporate both the expected depth and the collusive displacement. If we were to assign costs to the bits representations then a case can be argued for  $CoDISP()/g()$ , however pinning that quantity to a more fundamental notion likely requires substantial work which is left for the future.
